# Supplementary material for: Classification of pediatric gliomas based on immunological profiling: implications for immunotherapy strategies
Source: PubMed Central journal article supplement — Mol Ther Oncolytics. 2020 Dec 25;20:34–47. doi: 10.1016/j.omto.2020.12.012 (PMC7851498; doi:10.1016/j.omto.2020.12.012), 2020-12-25
Supplement: mmc1.pdf [file mmc1.pdf]

OMTO, Volume 20

## **Supplemental Information**

### **Classification of pediatric gliomas based on immunological profiling: implications for immunotherapy strategies**

**Zihao Wang, Xiaopeng Guo, Lu Gao, Yu Wang, Yi Guo, Bing Xing, and Wenbin Ma**

## **Supplemental text**

**Table S1.** Thirty-one immune signatures associated with the types, functions and molecular pathways of immune cells within pediatric gliomas.

**Table S2.** The most representative genes of each immune subtype.

**Figure S1.** Overall workflow of this study.

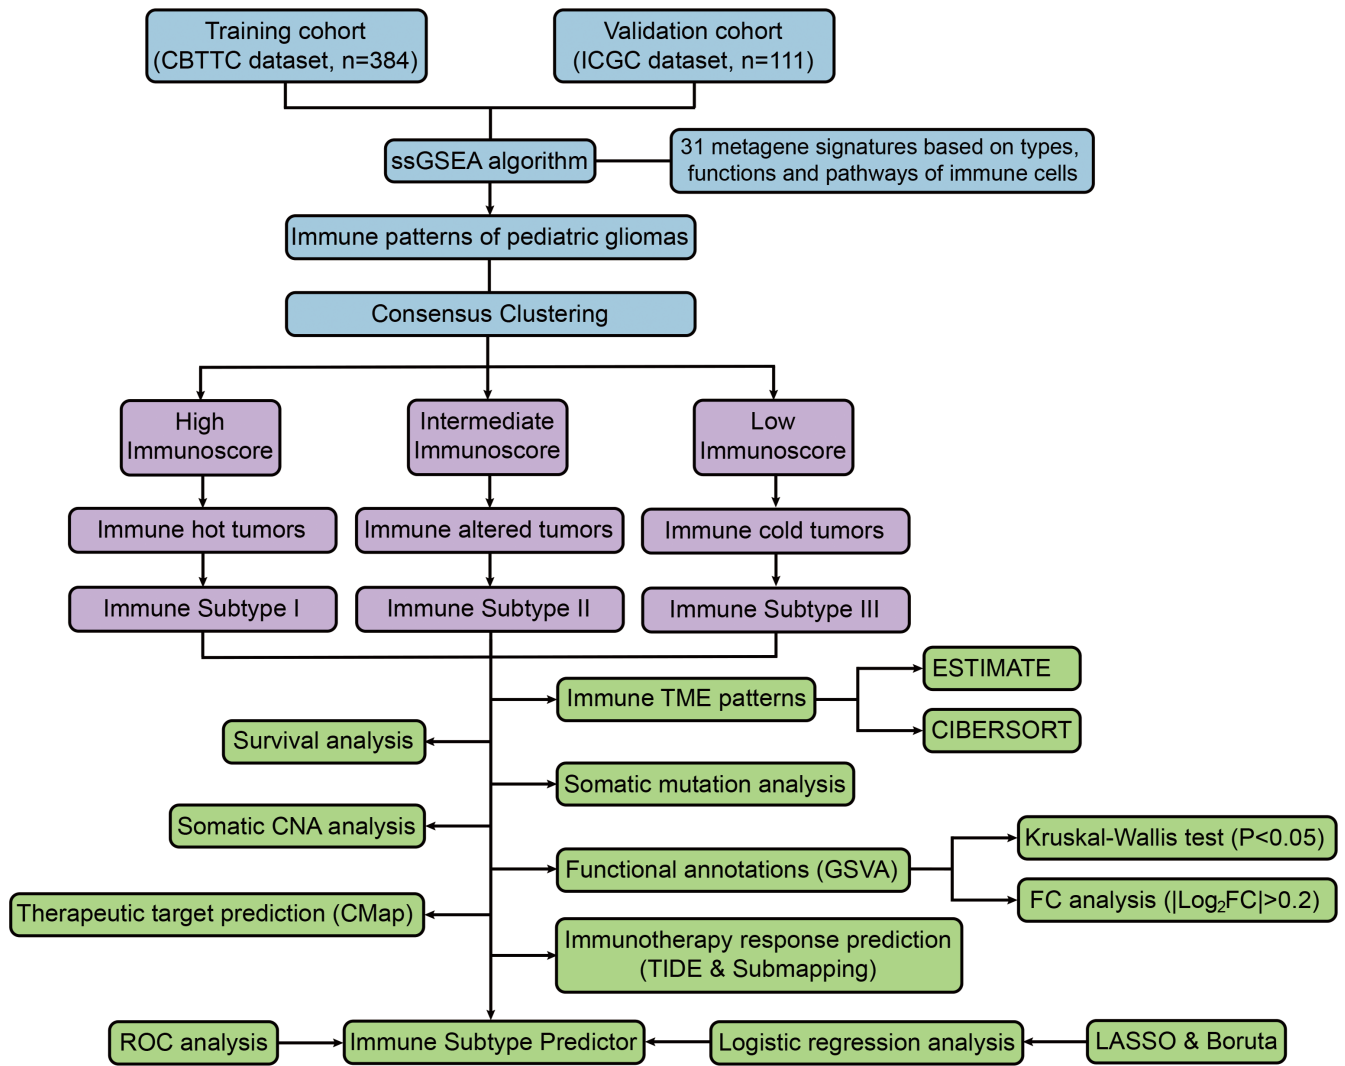

**Figure S1.** Overall workflow of this study.
